# Supplementary material
Source: Springer Nature journal article supplement (https://www.springermedizin.de/resource/supplementary/12943_2009_565_MOESM2_ESM.pdf/9554982)

### A. GeneRacer

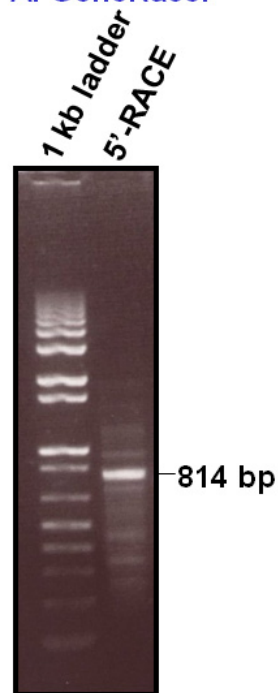

### B. Nucleotide sequence of ZAR2/BRCA2 gene promoter

TTGGCAGAGACAAAAGGGCAAGAAGCCGCGGCAGCGACCCGGGG  
 CGTGAGGCGCTCCCCGCCACGCTGGACTGGGACTGCGGAAGAC  
 GCGCTCGTCCCAACCCACTACCACCACCCTAACCCGCTCCAGA  
 GGTGCAGTTCTTTTTTGGCCGGAGTAAGCTGACAAAAACCGCGC

CGGTCACAAATCTGTCCCTCAAGCTTCTCCCGGCGGGGACCCA  
 CCGCCGCAAAGACACCCGAGGCGCAGCAGAGGCGCAGCAGTGC  
 CACAGCGGCTCCGCCTCTGCCGCCTAGTTTCAGAAGCTCGCGCC  
 ACAAGCCC GCGCTGGCCACGTGACGCCGTGACGCGACACGCAGC  
 ACACGCACCACCCGGAAGTCAGGCCTGGGTGGGCCGCTGCGGGT  
 ATTTCTCAGTGTGGCGAAAGGAAATTCCTTGT CAGGCATCCCAA  
 CCGTCAGTATCTGACCGAATAAAGCGGGAGCTGGAGTGTGTGT  
 CTCTTCTCGCTGA

TSS (ZAR2)

TSS (BRCA2)

Splice donor site

### C. Relative maps of BRCA2/ZAR2 gene promoters

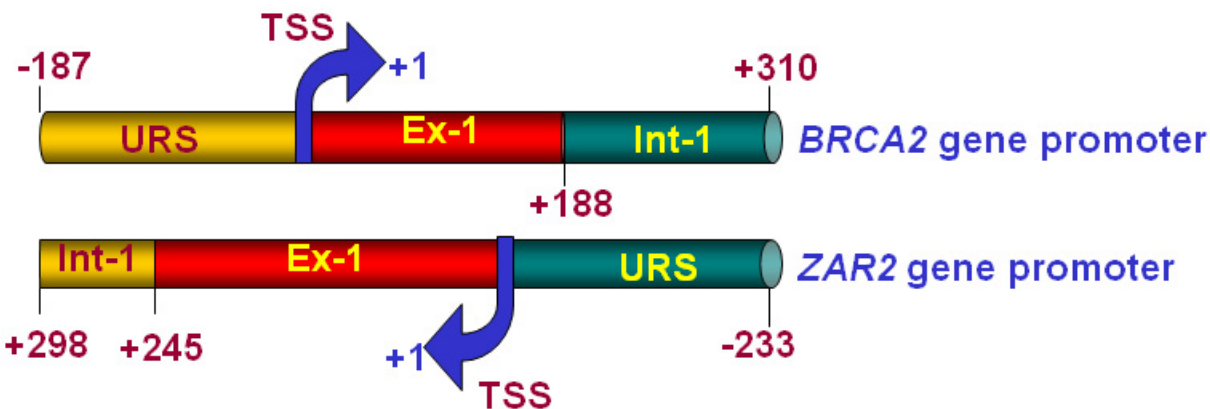

Supplement: MOESM2 [file 9554982]
